# Supplementary material for: Laccase–natural mediator systems for “green” synthesis of phenolic monomers from alkali lignin
Source: Royal Society of Chemistry journal article supplement (doi:10.1039/c7se00209b), 2017-01-01
Supplement: c7se00209b1.pdf [file c7se00209b1.pdf]

**Electronic Supporting Information:**  
**(Sustainable Energy & Fuels)**

**Laccase-Natural Mediator Systems for “Green” Synthesis of Phenolic Monomers from Alkali Lignin**

Bin Yao,<sup>a</sup> Praveen Kolla,<sup>b</sup> Ranjit Koodali,<sup>c</sup> Selvaratn Balaranjan,<sup>c</sup> Sunav Shrestha<sup>c</sup> and Alevtina Smirnova<sup>a,b,†</sup>

<sup>a</sup> Materials Engineering and Science Program, South Dakota School of Mines and Technology, Rapid City, SD, 57701.

<sup>b</sup> Chemistry and Applied Biological Sciences Department, South Dakota School of Mines and Technology, Rapid City, SD, 57701.

<sup>c</sup> Chemistry Department, University of South Dakota, Vermillion, SD, 57069.

†Corresponding authors:

Alevtina Smirnova: Tel: (860)428-0446. E-mail: [Alevtina.Smirnova@sdsmt.edu](mailto:Alevtina.Smirnova@sdsmt.edu)

The alkali lignin purchased from Sigma-Aldrich was characterized by nuclear magnetic resonance (NMR) and Fourier transform infrared spectroscopy (FTIR).

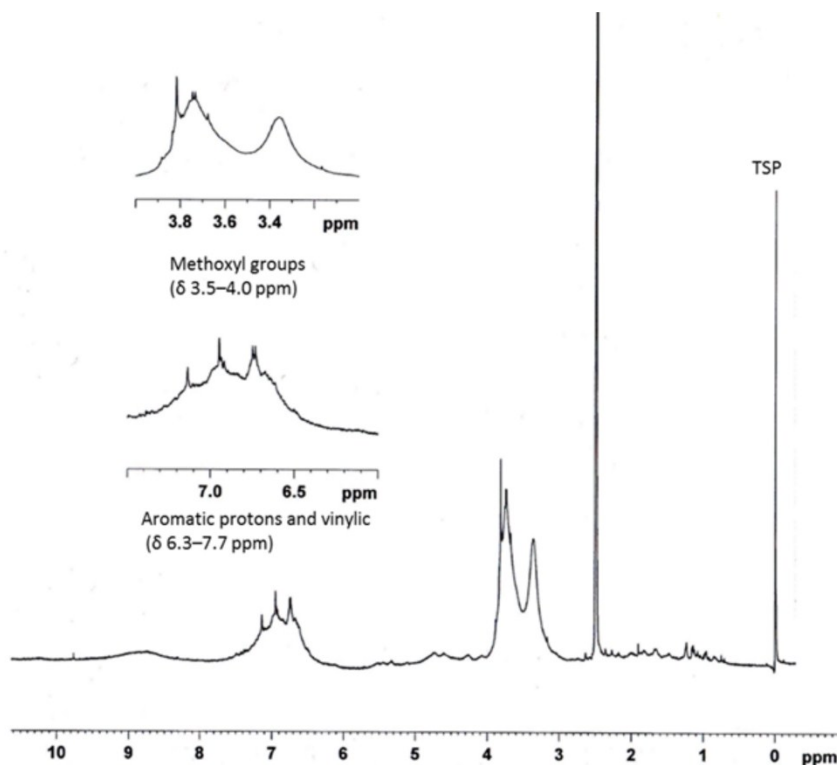

Fig. 1. The <sup>1</sup>H-NMR spectrum of alkali lignin before LMS treatment.

The alkali lignin before treatment by LMS was characterized by NMR (Bruker, 300HZ). The  $^1\text{H}$  assigned to the methyl group is at between  $\delta$  3.5 and 4.0 ppm. The protons of the aromatic and vinylic group are at between  $\delta$  6.3- 7.7 ppm.  $\text{H}_\alpha$  in  $\beta$ -O-4 structures is around 6.05 ppm.

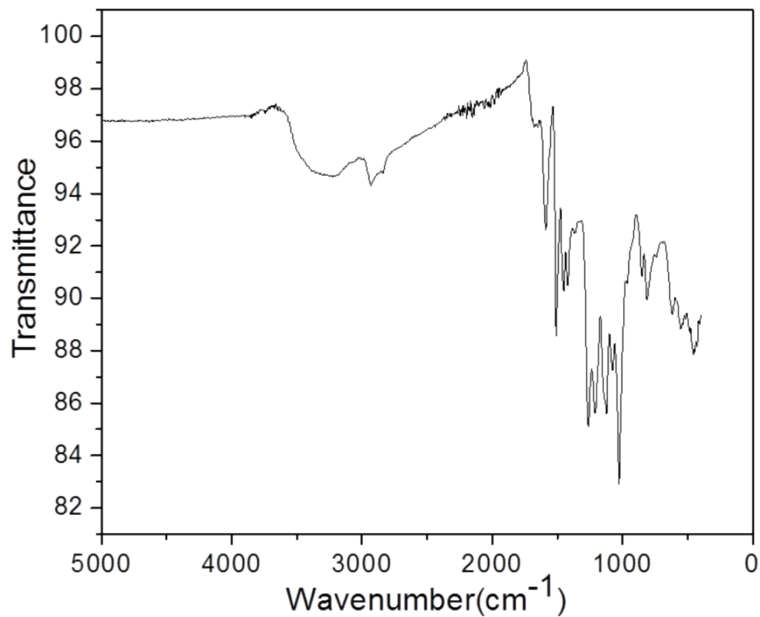

Fig. 2. The FT-IR spectrum of alkali lignin before LMS treatment.

The alkali lignin before treatment by LMS was characterized by FT-IR (Cary 660 FTIR spectrometer) from Agilent Technologies (Fig. 2). The absorption at  $3500\text{ cm}^{-1}$  is caused by the  $-\text{OH}$  stretching vibration of aliphatic and aromatic groups in the lignin. The absorption peak at  $2900\text{ cm}^{-1}$  is assigned to the stretching vibration of the  $\text{C}-\text{H}$  band of  $\text{CH}_2$ ,  $\text{CH}_3$ , and  $\text{CH}_3\text{O}$  groups in lignin. The peaks found at  $1465$  and  $1426\text{ cm}^{-1}$  are assigned to the stretching in the  $\text{Aryl}-\text{O}-\text{CH}_2$  bonds of the lignin. The peak at  $1268\text{ cm}^{-1}$  can be assigned to  $\text{C}-\text{O}$  stretching and  $\text{C}-\text{O}$ . The peak at  $1268\text{ cm}^{-1}$  belongs to  $\text{C}-\text{O}$  stretching and  $\text{C}-\text{O}$  linkage in guaiacyl aromatic methoxyl groups.

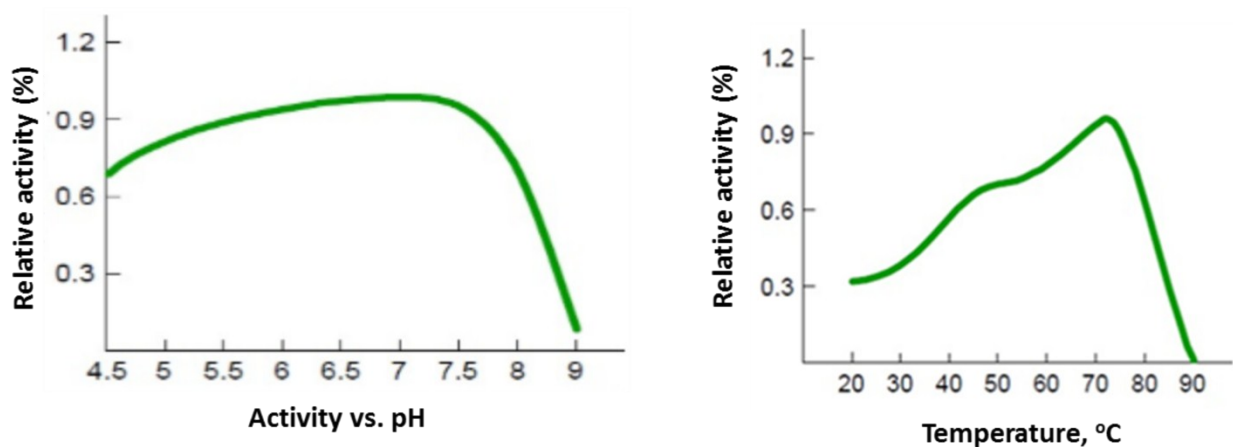

Fig. 3. Optimized pH and temperature for Laccase I (*Myceliophthora thermophila*)

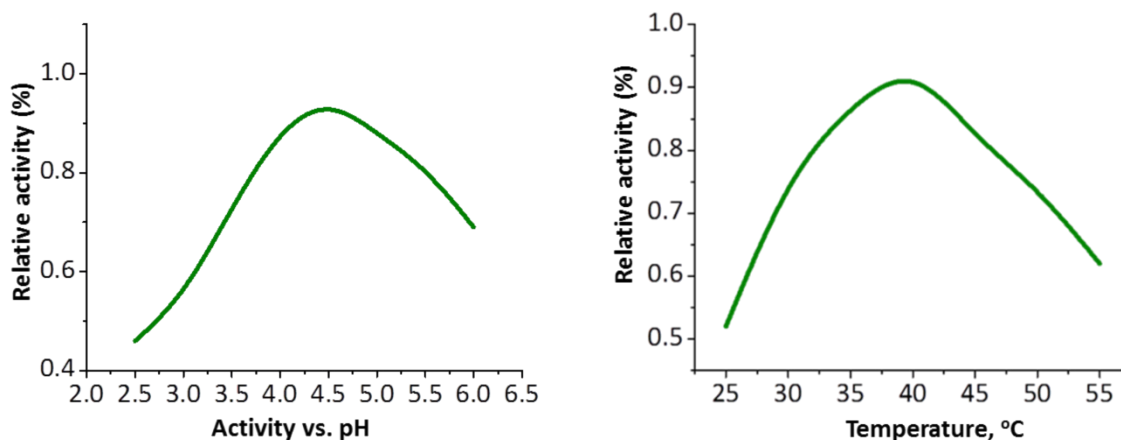

Fig. 4. Optimized pH and temperature of Laccase II (*Trametes versicolor*)

**Supplementary Table 1: Phenolic compounds identified by using pyr-GCMS in the solid-state lignin residue after treatment with LMT-MS and LTV-MS systems in comparison to the raw alkali lignin.**

| Name of the compound *                               | Raw lignin |                      |        | 5 wt. % LMT-5 wt. % MS |                      |        | 5 wt. % LTV-5 wt. % MS |                      |        |
|------------------------------------------------------|------------|----------------------|--------|------------------------|----------------------|--------|------------------------|----------------------|--------|
|                                                      | RT**       | Area                 | % Area | RT**                   | Area                 | % Area | RT**                   | Area                 | % Area |
| Phenol, 2-methyl-                                    | 14.9       | 5.80.10 <sup>7</sup> | 0.94   | 15.0                   | 1.01.10 <sup>8</sup> | 1.34   | 14.9                   | 1.32.10 <sup>8</sup> | 1.44   |
| Phenol, 3-methyl-                                    | 15.8       | 1.29.10 <sup>8</sup> | 1.47   | 15.9                   | 1.00.10 <sup>8</sup> | 1.32   | 15.9                   | 2.01.10 <sup>8</sup> | 2.05   |
| Phenol, dimethyl-                                    |            |                      |        | 17.4                   | 6.34.10 <sup>7</sup> | 0.55   | 17.8                   | 6.34.10 <sup>7</sup> | 0.98   |
| Phenol, dimethyl-                                    |            |                      |        | 18.0                   | 2.10.10 <sup>8</sup> | 1.88   | 17.9                   | 2.38.10 <sup>8</sup> | 2.77   |
| Phenol, dimethyl-                                    |            |                      |        | 18.1                   | 7.89.10 <sup>7</sup> | 0.66   | 18.2                   | 8.21.10 <sup>7</sup> | 0.48   |
| Hydroquinone                                         | 20.3       | 3.87.10 <sup>8</sup> | 4.43   | 20.4                   | 4.88.10 <sup>8</sup> | 4.47   | 20.4                   | 5.56.10 <sup>8</sup> | 4.78   |
| 1,2-Benzenediol, 3-methoxy-                          | 22.5       | 1.98.10 <sup>8</sup> | 2.01   |                        | 2.12.10 <sup>8</sup> | 2.34   |                        | 2.52.10 <sup>8</sup> | 2.88   |
| 1,2-Benzenediol, 4-methyl-                           |            |                      |        |                        |                      |        |                        | 1.55.10 <sup>8</sup> | 1.76   |
| 2-methoxy-4-methylphenol                             | 24.3       | 2.33.10 <sup>7</sup> | 0.55   | 24.9                   | 0.98.10 <sup>8</sup> | 1.12   | 25.1                   | 1.02.10 <sup>8</sup> | 1.23   |
| Phenol, 4-ethyl-2-methoxy-                           |            |                      |        | 26.3                   | 1.57.10 <sup>8</sup> | 1.59   | 26.2                   | 1.67.10 <sup>8</sup> | 1.83   |
| 3-allyl-6-methoxyphenol                              |            |                      |        | 27.1                   | 1.45.10 <sup>8</sup> | 1.50   | 27.2                   | 1.48.10 <sup>8</sup> | 1.54   |
| Phenol, 2-methoxy-4-(2-propenyl)-, acetate           | 28.8       | 2.76.10 <sup>8</sup> | 3.12   | 28.8                   | 3.34.10 <sup>8</sup> | 3.87   | 28.9                   | 3.12.10 <sup>8</sup> | 3.33   |
| 4'-Hydroxy-3'-methoxyacetophenone                    |            |                      |        | 30.1                   | 1.78.10 <sup>8</sup> | 1.68   | 30.0                   | 1.88.10 <sup>8</sup> | 1.93   |
| Benzoic acid, 4-(acetyloxy)-3-methoxy-, methyl ester |            |                      |        | 38.7                   | 1.56.10 <sup>8</sup> | 1.58   | 38.8                   | 1.82.10 <sup>8</sup> | 1.92   |
| Benzoic acid, 3,5-dimethoxy-, methyl ester           |            |                      |        | 57.9                   | 5.56.10 <sup>7</sup> | 0.43   | 56.7                   | 8.76.10 <sup>7</sup> | 0.99   |
| [1,1'-Biphenyl]-4,4'-diol, 3,3'-dimethoxy-           | 58.9       | 8.18.10 <sup>7</sup> | 1.11   |                        |                      |        |                        |                      |        |
| 1,1'-Biphenyl, 6-hydroxy-2',3',4'-trimethoxy-        | 60.3       | 4.23.10 <sup>7</sup> | 0.76   |                        |                      |        |                        |                      |        |

\*The names of compounds are based on the identification using the MS NIST library; RT\*\* - Retention time.
